# Supplementary material for: Geometric, electronic and magnetic structures of S = 19/2 and S = 20/2 thiophene-2-carboxylate functionalized Mn12 single molecule magnets
Source: Royal Society of Chemistry journal article supplement (doi:10.1039/c4dt02703e), 2014-10-31
Supplement: c4dt02703e1.pdf [file c4dt02703e1.pdf]

## Geometric, Electronic and Magnetic Structures of S=19/2 and S=20/2 Thiophene-2-carboxylate Functionalized Mn<sub>12</sub> Single Molecule Magnets

Jorge H. Rodriguez<sup>1,\*</sup> and Christopher J. Ziegler<sup>2</sup>

<sup>1</sup> Department of Physics and Astronomy, Purdue University, West Lafayette, IN 47907-2036.

<sup>2</sup> Department of Chemistry, University of Akron, Akron, OH 44325-3601.

### Supplementary Material

#### I. Structural analysis

Structurally, the Mn atoms in both clusters can be divided into two types. The core of the cluster is composed of a cubane in which Mn<sub>1-4</sub> occupy alternating corners (defining a tetrahedron) with oxo atoms making up the rest of the cubane. The remaining eight ions, Mn<sub>5-12</sub>, comprise the outer ring of the cluster. Within this ring there are two types of manganese positions, namely those engaged in diamond type interactions with cubane manganese atoms and those that bridge these cubane segments. Water molecules are bound to Mn atoms in the latter positions.

Four of the eight manganese atoms that comprise the ring in the periphery of the clusters interact with the cubane manganese atoms via  $\mu$ -oxo bridged diamond shaped structures. The diamond bond lengths in **I** typically range from  $\approx 1.93$  to  $1.98$  Å, but two of the opposing diamonds in the cluster have a more asymmetric arrangement of bonds, comprised of two short and one long Mn-O interaction ( $1.908$ ,  $1.911$  and  $2.013$  Å for one and  $1.899$ ,  $1.908$  and  $2.036$  Å for the second). The fourth bond completing these diamonds is of intermediate length. In **II**, this same asymmetry is observed in each of the four diamonds, with each having a long bond ( $2.032$ ,  $2.019$ ,  $2.019$ ,  $2.037$  Å), two short bonds ( $1.883$ ,  $1.926$ ,  $1.871$ ,  $1.930$ ,  $1.866$ ,  $1.923$ ,  $1.877$ ,  $1.914$  Å) and one *intermediate bond* ( $1.939$ ,  $1.935$ ,  $1.927$ ,  $1.953$  Å), although the latter are closer in length to the short bonds of the cubanes. The remaining four periphery ions (Mn<sub>9,10,11,12</sub>) bridge the diamonds themselves. In **I**, the Mn-O bonds that connect the diamonds to the rest of the manganese ring are fairly uniform, ranging between  $1.938$  and  $1.953$  Å. Two bonds, however, lie outside this range. For each of the manganese atom sites with bound water molecules, there is a much longer Mn-O bond ( $2.033$  and  $2.055$  Å). In **II**, the corresponding bonds are much more symmetric, with one short ( $\approx 1.95$  Å) and one long bond ( $\approx 2.02$  Å) per manganese. Notably, the long-short arrangement is chiral, i.e. they exhibit a clockwise/counterclockwise orientation, in a fashion similar to the orientations of the water molecules.

In contrast to their bond lengths, the Mn-O-Mn angles in the cubane units of the two clusters do not differ significantly. Each oxygen atom of the cubane is surrounded by one larger angle of  $\approx 98$ - $100^\circ$  and two slightly more acute angles of  $\approx 93$ - $98^\circ$ . In the diamond moieties, the structure of **II** has a more regular pattern of Mn-O-Mn bonds, with each diamond containing one  $\approx 100^\circ$  angle and a smaller  $\approx 94$  degrees angle. The structure of **I** exhibits greater diversity in these bond angles, which range from  $\approx 92^\circ$  to  $\approx 98^\circ$ . Around the exterior of the manganese ring, the Mn-O-Mn bonds in **I** also show a wider degree of variance, ranging from  $\approx 125^\circ$  to  $\approx 130^\circ$ , than seen in **II**, which exhibits exterior Mn-O-Mn bond angles that vary in a chiral pattern, between a smaller ( $\approx 123$ - $126^\circ$ ) and a larger ( $\approx 130$ - $132^\circ$ ) angle. Thus, as expected for two *versus* four water-bound structures, **I** shows more bonding angle variance and asymmetry than **II**.

In addition to visualizing the clusters as cubane-ring structures, one can take a different perspective, namely that of a *sandwich*. The clusters are terminated by two arrangements of fairly *planar*  $\text{Mn}_4\text{O}_6$  units (see Fig. S1) which sandwich the remaining four (not shown) *interstitial* atoms ( $\text{Mn}_{9-12}$ ). The degree of asymmetry of each cluster can then be assessed by the relative positions of the latter. In **I**, each of the two waters are bound to an *interstitial* manganese site whereas the other two sites remain unsaturated. In **II**, each of the four waters is bound to one of the four interstitial sites. Such interstitial atoms alternatively lie closer to one of the two  $\text{Mn}_4\text{O}_6$  planes. In **II**, each interstitial manganese lies  $\approx 0.5$  Å to the closest plane (0.515, 0.510, 0.500 and 0.528 Å), resulting in a highly symmetric structure. By contrast, in **I** the arrangements of the corresponding atoms are more variable, with distances ranging between 0.57 and 0.71 Å (0.709, 0.701, 0.571 and 0.677 Å). Thus, the arrangement of the *interstitial* metal positions in **I** is more variable and, consequently, the relative Mn-Mn positions in this cluster show greater structural disorder.

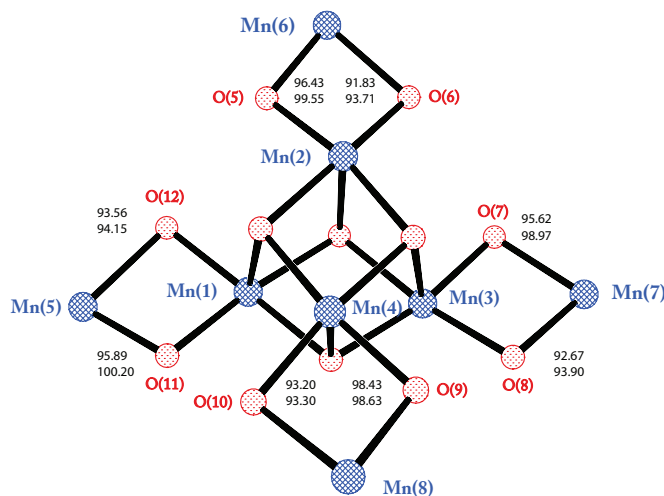

Figure S1: Optimized Mn-O-Mn bonding angles (degrees) of *planar*  $\text{Mn}_4\text{O}_6$  units. Numbers on top and bottom correspond to angles of **I** and **II**, respectively.

## II. Computational Details

The optimized geometries reported in Tables S1 and S2 were obtained using the PBE functional as implemented in the Siesta 3.1 package in conjunction with DZP basis functions and associated pseudopotentials. Spin polarized calculations were performed to converge to the ferrimagnetic states  $S = 19/2$  and  $S = 20/2$  of **I** and **II**, respectively. The default convergence criteria implemented in Siesta 3.1 was used to carry out all geometry optimizations.

Further single point calculations were carried out on the optimized geometries with Gaussian 09 to compute partial charges and magnetic moments *via* Mulliken and NBO population analyses. These quantities are based on spin unrestricted (U) PBE-PBE (referred to in the main text as PBE), B3-LYP,a and mPW1-PW91 calculations with several combinations of all-electron basis sets. For **I**, atomic centers 1-58 reported in Table S3 were treated with the 6-311G\* (5D, 7F) basis whereas for atomic centers 59-206 several alternative basis sets were used (STO-3G, 3-21G\* and 6-311G\*). The main trends produced by the various combinations of basis sets were similar since the larger basis (6-311G\*) was used for the Mn inner and outer cores in all cases. For **II**, atomic centers 1-60 reported in Table S4 were treated with the 6-311G\* (5D, 7F) basis whereas for atomic centers 61-212 we also used all the combinations mentioned above.

### III. Tables of structural parameters

Table S1: Mn-O bond lengths (Å) for the ferrimagnetic ( $\Phi_{S=19/2}^{KS}$ ) state of I.

|         |       |          |       |
|---------|-------|----------|-------|
| Mn1-O1  | 2.093 | Mn6-O37  | 2.085 |
| Mn1-O2  | 1.944 | Mn7-O7   | 1.941 |
| Mn1-O4  | 1.962 | Mn7-O8   | 1.980 |
| Mn1-O11 | 1.930 | Mn7-O20  | 2.220 |
| Mn1-O12 | 1.963 | Mn7-O22  | 2.009 |
| Mn1-O42 | 2.021 | Mn7-O23  | 1.976 |
| Mn2-O1  | 1.970 | Mn7-O44  | 2.175 |
| Mn2-O2  | 1.997 | Mn8-O9   | 1.908 |
| Mn2-O3  | 1.969 | Mn8-O10  | 2.036 |
| Mn2-O5  | 1.908 | Mn8-O26  | 2.062 |
| Mn2-O6  | 1.951 | Mn8-O28  | 2.095 |
| Mn2-O38 | 2.034 | Mn8-O29  | 2.017 |
| Mn3-O2  | 1.960 | Mn8-O40  | 2.114 |
| Mn3-O3  | 2.127 | Mn9-O5   | 2.033 |
| Mn3-O4  | 1.967 | Mn9-O12  | 1.941 |
| Mn3-O7  | 1.931 | Mn9-O13  | 2.018 |
| Mn3-O8  | 1.986 | Mn9-O15  | 2.103 |
| Mn3-O43 | 2.026 | Mn9-O36  | 2.073 |
| Mn4-O1  | 1.969 | Mn9-O45  | 2.163 |
| Mn4-O3  | 1.966 | Mn10-O6  | 1.944 |
| Mn4-O4  | 1.977 | Mn10-O7  | 1.953 |
| Mn4-O9  | 1.899 | Mn10-O18 | 2.032 |
| Mn4-O10 | 1.930 | Mn10-O19 | 2.113 |
| Mn4-O39 | 1.960 | Mn10-O21 | 2.038 |
| Mn5-O11 | 1.943 | Mn11-O8  | 1.945 |
| Mn5-O12 | 1.983 | Mn11-O9  | 2.055 |
| Mn5-O32 | 2.199 | Mn11-O24 | 2.107 |
| Mn5-O34 | 2.016 | Mn11-O25 | 2.005 |
| Mn5-O35 | 1.992 | Mn11-O27 | 2.090 |
| Mn5-O41 | 2.167 | Mn11-O46 | 2.121 |
| Mn6-O5  | 1.911 | Mn12-O10 | 1.953 |
| Mn6-O6  | 2.013 | Mn12-O11 | 1.938 |
| Mn6-O14 | 2.029 | Mn12-O30 | 2.010 |
| Mn6-O16 | 2.079 | Mn12-O31 | 2.110 |
| Mn6-O17 | 2.005 | Mn12-O33 | 2.054 |

Table S2: Mn-O bond lengths (Å) for the ferrimagnetic ( $\Phi_{S=20/2}^{KS}$ ) state of II.

|         |       |          |       |
|---------|-------|----------|-------|
| Mn1-O1  | 1.978 | Mn7-O7   | 1.930 |
| Mn1-O2  | 2.113 | Mn7-O8   | 2.019 |
| Mn1-O4  | 2.004 | Mn7-O20  | 2.198 |
| Mn1-O11 | 1.877 | Mn7-O22  | 2.041 |
| Mn1-O12 | 1.953 | Mn7-O23  | 1.990 |
| Mn1-O42 | 1.941 | Mn7-O44  | 2.186 |
| Mn2-O1  | 1.985 | Mn8-O9   | 1.926 |
| Mn2-O2  | 1.990 | Mn8-O10  | 2.032 |
| Mn2-O3  | 1.983 | Mn8-O26  | 2.042 |
| Mn2-O5  | 1.866 | Mn8-O28  | 2.191 |
| Mn2-O6  | 1.927 | Mn8-O29  | 1.985 |
| Mn2-O38 | 1.934 | Mn8-O40  | 2.173 |
| Mn3-O2  | 1.846 | Mn9-O5   | 2.050 |
| Mn3-O3  | 1.972 | Mn9-O12  | 1.967 |
| Mn3-O4  | 1.977 | Mn9-O13  | 2.001 |
| Mn3-O7  | 1.871 | Mn9-O15  | 2.064 |
| Mn3-O8  | 1.935 | Mn9-O36  | 2.098 |
| Mn3-O43 | 1.938 | Mn9-O45  | 2.114 |
| Mn4-O1  | 1.985 | Mn10-O6  | 1.946 |
| Mn4-O3  | 1.999 | Mn10-O7  | 2.020 |
| Mn4-O4  | 1.971 | Mn10-O18 | 2.062 |
| Mn4-O9  | 1.883 | Mn10-O19 | 2.096 |
| Mn4-O10 | 1.939 | Mn10-O21 | 1.987 |
| Mn4-O39 | 1.943 | Mn10-O46 | 2.156 |
| Mn5-O11 | 1.914 | Mn11-O8  | 1.953 |
| Mn5-O12 | 2.019 | Mn11-O9  | 2.015 |
| Mn5-O32 | 2.216 | Mn11-O24 | 2.057 |
| Mn5-O34 | 2.036 | Mn11-O25 | 1.991 |
| Mn5-O35 | 1.976 | Mn11-O27 | 2.098 |
| Mn5-O41 | 2.194 | Mn11-O47 | 2.166 |
| Mn6-O5  | 1.923 | Mn12-O10 | 1.955 |
| Mn6-O6  | 2.037 | Mn12-O11 | 2.003 |
| Mn6-O14 | 2.048 | Mn12-O30 | 2.050 |
| Mn6-O16 | 2.205 | Mn12-O31 | 2.099 |
| Mn6-O17 | 1.988 | Mn12-O33 | 1.994 |
| Mn6-O37 | 2.180 | Mn12-O48 | 2.148 |

Table S3: Optimized Cartesian coordinates of  $\text{Mn}_{12}\text{O}_{12}(\text{O}_2\text{CC}_4\text{H}_3\text{S})_{16}(\text{H}_2\text{O})_2\}^{-1}$  (I) for its ferrimagnetic state  $S = 19/2$ . Optimization performed at the U-PBE/DZP level of theory.

|    |           |           |           |
|----|-----------|-----------|-----------|
| Mn | -1.115538 | 1.057401  | 0.932101  |
| Mn | -1.035835 | -1.008032 | -1.273422 |
| Mn | 0.981729  | -1.019720 | 0.950238  |
| Mn | 1.005388  | 1.153935  | -1.127098 |
| Mn | -2.976414 | 3.232465  | 1.207415  |
| Mn | -3.197296 | -2.861687 | -1.225015 |
| Mn | 2.801124  | -3.224798 | 1.188197  |
| Mn | 3.196325  | 3.026841  | -1.097900 |
| Mn | -4.251866 | 0.388412  | -0.408692 |
| Mn | -0.280019 | -4.183615 | 0.085131  |
| Mn | 4.144915  | -0.357490 | -0.376636 |
| Mn | 0.142702  | 4.263687  | 0.199043  |
| O  | -0.953782 | 0.956501  | -1.151698 |
| O  | -0.958109 | -0.868212 | 0.717396  |
| O  | 0.921057  | -0.820594 | -1.166347 |
| O  | 0.839718  | 0.937372  | 0.819484  |
| O  | -2.940786 | -0.969048 | -1.163844 |
| O  | -1.189673 | -2.945980 | -1.106576 |
| O  | 0.885918  | -2.946232 | 1.046663  |
| O  | 2.947485  | -1.279825 | 0.847108  |
| O  | 2.902302  | 1.143340  | -1.030592 |
| O  | 1.167737  | 3.066934  | -0.929950 |
| O  | -1.055794 | 2.982620  | 1.056567  |
| O  | -3.063038 | 1.286503  | 0.835970  |
| O  | -5.695965 | -0.373475 | -1.593884 |
| O  | -5.175258 | -2.629870 | -1.611648 |
| O  | -4.730169 | -1.039843 | 1.059190  |
| O  | -3.467894 | -2.958261 | 0.833552  |
| O  | -3.491360 | -4.826741 | -1.493787 |
| O  | -1.696460 | -5.597775 | -0.263439 |
| O  | 1.057444  | -5.059583 | -1.297168 |
| O  | 2.956900  | -3.824330 | -0.943380 |
| O  | 0.347201  | -5.619135 | 1.389227  |
| O  | 2.609300  | -5.176397 | 1.623330  |
| O  | 4.741516  | -3.584368 | 1.288861  |
| O  | 5.596044  | -1.826220 | 0.044655  |
| O  | 5.618390  | 0.425259  | -1.488943 |
| O  | 5.172045  | 2.711510  | -1.595723 |
| O  | 4.703629  | 0.947981  | 1.156896  |
| O  | 3.706494  | 3.037538  | 0.933868  |
| O  | 3.485689  | 5.022545  | -1.154424 |
| O  | 1.613399  | 5.626594  | 0.064957  |
| O  | -1.196653 | 5.153195  | -1.167022 |
| O  | -3.149120 | 3.963714  | -0.859519 |
| O  | -0.481233 | 5.609104  | 1.620399  |
| O  | -2.743827 | 5.165015  | 1.732789  |
| O  | -4.942218 | 3.497248  | 1.392492  |
| O  | -5.739721 | 1.722056  | 0.142214  |
| O  | -2.945901 | -2.624233 | -3.281506 |
| O  | -1.253130 | -1.048847 | -3.295394 |
| O  | 1.152285  | 1.266409  | -3.077902 |
| O  | 2.840125  | 2.848773  | -3.174296 |
| O  | -2.831570 | 2.599584  | 3.274874  |
| O  | -1.273231 | 0.918618  | 2.942427  |

|   |           |           |           |
|---|-----------|-----------|-----------|
| O | 1.061754  | -0.919647 | 2.971987  |
| O | 2.621937  | -2.605113 | 3.265852  |
| O | -3.389043 | 1.624838  | -1.959435 |
| O | 3.291868  | -1.490160 | -1.953501 |
| S | -4.860926 | 5.643623  | -2.680557 |
| S | -1.583502 | -0.489297 | 5.476881  |
| S | -1.607875 | -0.369683 | -6.297714 |
| S | 3.114510  | -2.052590 | 6.197593  |
| S | 3.265330  | 2.616050  | -6.179150 |
| S | -3.412269 | -3.699425 | 3.728697  |
| S | 4.529447  | -4.924096 | -3.268503 |
| S | 3.629750  | 3.710964  | 3.828060  |
| S | -2.072736 | -8.473624 | -0.719807 |
| S | -7.279007 | -3.461110 | -3.532365 |
| S | 3.366897  | -7.725576 | 2.911751  |
| S | 8.446112  | -2.534883 | 0.264346  |
| S | 7.604448  | 3.544292  | -2.932529 |
| S | 4.772329  | 7.733706  | -1.139466 |
| S | -0.431841 | 7.611339  | 3.845566  |
| S | -7.596740 | 4.515100  | 2.302363  |
| C | -4.783982 | 7.069845  | -3.750161 |
| C | -3.107724 | 5.816697  | -2.333976 |
| C | -2.565852 | 6.894032  | -3.012735 |
| C | -3.512046 | 7.602617  | -3.812648 |
| C | -2.427834 | 4.908154  | -1.390580 |
| C | -2.160731 | 1.576204  | 3.628437  |
| C | -2.383163 | 1.039871  | 4.984088  |
| C | -2.330117 | -0.344554 | 7.085585  |
| C | -3.126647 | 0.778393  | 7.195442  |
| C | -3.160519 | 1.561778  | 6.003131  |
| C | -2.216470 | -1.732314 | -3.830692 |
| C | -2.550779 | -1.472271 | -5.243956 |
| C | -2.728462 | -0.701516 | -7.642986 |
| C | -3.736258 | -1.567363 | -7.273439 |
| C | -3.637528 | -2.002117 | -5.918552 |
| C | 1.933802  | -1.600042 | 3.648717  |
| C | 2.120504  | -1.115995 | 5.028526  |
| C | 2.790076  | -0.816696 | 7.445236  |
| C | 2.006609  | 0.212010  | 6.964888  |
| C | 1.634234  | 0.047398  | 5.595783  |
| C | 2.069889  | 1.967601  | -3.676184 |
| C | 2.194407  | 1.658282  | -5.106256 |
| C | 2.808905  | 1.562407  | -7.545540 |
| C | 1.924646  | 0.572734  | -7.168429 |
| C | 1.580653  | 0.623918  | -5.785294 |
| C | -4.103081 | -2.058638 | 1.508129  |
| C | -4.160022 | -2.256101 | 2.969173  |
| C | -4.015988 | -3.164307 | 5.319188  |
| C | -4.715809 | -1.977962 | 5.236305  |
| C | -4.791894 | -1.460484 | 3.908237  |
| C | 2.233982  | -4.679102 | -1.601190 |
| C | 2.831725  | -5.280907 | -2.805609 |
| C | 2.241078  | -6.156252 | -3.698900 |
| C | 3.105287  | -6.559946 | -4.759789 |
| C | 4.361800  | -5.995863 | -4.683008 |
| C | 4.193909  | 2.042326  | 1.595817  |
| C | 4.211330  | 2.193548  | 3.063734  |
| C | 4.623515  | 1.274288  | 4.011017  |
| C | 4.510926  | 1.750714  | 5.352325  |

|   |            |           |           |
|---|------------|-----------|-----------|
| C | 3.999225   | 3.029071  | 5.435615  |
| C | -2.728887  | -5.743157 | -1.007634 |
| C | -3.087224  | -7.128765 | -1.342332 |
| C | -4.118958  | -7.596643 | -2.136576 |
| C | -4.131042  | -9.018563 | -2.267802 |
| C | -3.112269  | -9.641776 | -1.575057 |
| C | -5.876405  | -1.606634 | -1.913459 |
| C | -7.067131  | -1.867581 | -2.736586 |
| C | -8.117760  | -1.017302 | -3.011387 |
| C | -9.115859  | -1.595942 | -3.851388 |
| C | -8.820316  | -2.889696 | -4.226958 |
| C | 1.552452   | -5.905286 | 1.718191  |
| C | 1.757087   | -7.252153 | 2.271556  |
| C | 0.843434   | -8.285822 | 2.369967  |
| C | 1.386657   | -9.465949 | 2.961415  |
| C | 2.714779   | -9.337269 | 3.314330  |
| C | 5.687850   | -2.886765 | 0.741106  |
| C | 7.044898   | -3.410654 | 0.966503  |
| C | 7.446115   | -4.523307 | 1.681899  |
| C | 8.861499   | -4.708473 | 1.689933  |
| C | 9.543887   | -3.740816 | 0.981261  |
| C | 5.889710   | 1.663926  | -1.742576 |
| C | 7.235222   | 1.905637  | -2.296836 |
| C | 8.322682   | 1.058154  | -2.408939 |
| C | 9.460979   | 1.683888  | -3.006119 |
| C | 9.245441   | 3.002140  | -3.350756 |
| C | 2.735805   | 5.851491  | -0.511568 |
| C | 3.210388   | 7.237706  | -0.410417 |
| C | 4.505115   | 9.393611  | -0.544714 |
| C | 3.316792   | 9.520192  | 0.144471  |
| C | 2.583770   | 8.297883  | 0.224573  |
| C | -1.671069  | 5.786812  | 2.064410  |
| C | -1.853650  | 6.846476  | 3.068366  |
| C | -1.525052  | 8.631772  | 4.821767  |
| C | -2.851297  | 8.372399  | 4.550488  |
| C | -3.038486  | 7.355596  | 3.565145  |
| C | -5.869378  | 2.755626  | 0.874556  |
| C | -7.253205  | 3.164005  | 1.170008  |
| C | -9.345182  | 4.262910  | 2.055735  |
| C | -9.604442  | 3.236013  | 1.171792  |
| C | -8.421951  | 2.613436  | 0.672568  |
| H | 2.978041   | 10.462830 | 0.587282  |
| H | 1.622102   | 8.167664  | 0.736766  |
| H | 5.251604   | 10.165965 | -0.747556 |
| H | -4.009481  | 6.989557  | 3.213324  |
| H | -1.103760  | 9.349574  | 5.530296  |
| H | -3.677822  | 8.895661  | 5.044441  |
| H | -8.412471  | 1.781623  | -0.040811 |
| H | -10.060553 | 4.894654  | 2.589629  |
| H | -10.616172 | 2.931299  | 0.879096  |
| H | -8.139311  | -0.004611 | -2.594083 |
| H | -10.024658 | -1.070784 | -4.167552 |
| H | -9.406135  | -3.556317 | -4.864810 |
| H | 6.722289   | -5.176542 | 2.182416  |
| H | 9.361060   | -5.535715 | 2.207894  |
| H | 10.622148  | -3.647565 | 0.829013  |
| H | 8.289069   | 0.020559  | -2.053338 |
| H | 10.414337  | 1.177642  | -3.183659 |
| H | 9.944094   | 3.696733  | -3.824624 |

|   |           |            |           |
|---|-----------|------------|-----------|
| H | -0.185792 | -8.180679  | 2.006042  |
| H | 0.815624  | -10.389105 | 3.113549  |
| H | 3.369418  | -10.091536 | 3.759688  |
| H | -4.834258 | -6.913229  | -2.608552 |
| H | -4.870804 | -9.574164  | -2.856191 |
| H | -2.899781 | -10.712847 | -1.513202 |
| H | -3.725182 | 2.492329   | 5.875065  |
| H | -2.140038 | -1.111214  | 7.841127  |
| H | -3.671849 | 1.042256   | 8.109928  |
| H | -4.533966 | -1.883425  | -7.956012 |
| H | 1.527016  | -0.177619  | -7.862002 |
| H | 3.232576  | 1.750927   | -8.535460 |
| H | -3.796828 | -3.757325  | 6.211245  |
| H | -5.153439 | -1.474554  | 6.106370  |
| H | -5.292238 | -0.528692  | 3.623297  |
| H | 1.040289  | 0.760011   | 5.013729  |
| H | 1.706155  | 1.074485   | 7.572129  |
| H | 3.207794  | -0.937075  | 8.448567  |
| H | 4.982484  | 0.279455   | 3.724090  |
| H | 4.784246  | 1.153537   | 6.229626  |
| H | 3.802180  | 3.620064   | 6.334198  |
| H | -1.504819 | 7.150600   | -2.925823 |
| H | -3.255607 | 8.485075   | -4.410801 |
| H | -5.685197 | 7.418591   | -4.262062 |
| H | 1.204850  | -6.487090  | -3.571440 |
| H | 2.804650  | -7.249521  | -5.557537 |
| H | 5.208179  | -6.136276  | -5.360756 |
| H | -4.345454 | -2.668930  | -5.411644 |
| H | -2.564251 | -0.222300  | -8.611601 |
| H | 0.903857  | -0.064627  | -5.267657 |
| H | 3.308198  | -2.473034  | -1.667074 |
| H | 2.288943  | -1.277648  | -1.809797 |
| H | -2.392161 | 1.441683   | -1.803548 |
| H | -3.436912 | 2.597736   | -1.665490 |



Table S4: Optimized Cartesian coordinates of  $\text{Mn}_{12}\text{O}_{12}(\text{O}_2\text{CC}_4\text{H}_3\text{S})_{16}(\text{H}_2\text{O})_4$  (II) for its ferrimagnetic state  $S = 20/2$ . Optimization performed at the U-PBE/DZP level of theory.

|    |           |           |           |
|----|-----------|-----------|-----------|
| Mn | 0.068143  | -1.527485 | -1.017519 |
| Mn | -1.595804 | -0.200372 | 1.031968  |
| Mn | -0.297974 | 1.486551  | -1.007097 |
| Mn | 1.408368  | 0.169595  | 1.005966  |
| Mn | 0.836575  | -4.328927 | -1.163940 |
| Mn | -4.375477 | -0.991341 | 1.164887  |
| Mn | -1.053815 | 4.274921  | -1.068145 |
| Mn | 4.210411  | 0.866358  | 1.077209  |
| Mn | -2.147499 | -3.697598 | 0.502077  |
| Mn | -3.740258 | 2.078902  | -0.367551 |
| Mn | 2.040792  | 3.609058  | 0.422945  |
| Mn | 3.513803  | -2.122358 | -0.531304 |
| O  | 0.061949  | -1.287928 | 0.945927  |
| O  | -1.390116 | -0.173756 | -0.937212 |
| O  | -0.262541 | 1.266019  | 0.952286  |
| O  | 1.159796  | 0.152172  | -0.949099 |
| O  | -2.623587 | -1.755680 | 0.953235  |
| O  | -3.288395 | 0.717128  | 0.947286  |
| O  | -1.853242 | 2.523457  | -0.934975 |
| O  | 0.627792  | 3.178470  | -0.855125 |
| O  | 2.486334  | 1.711760  | 0.933385  |
| O  | 3.077425  | -0.804356 | 0.845268  |
| O  | 1.612265  | -2.592840 | -0.947131 |
| O  | -0.848932 | -3.247657 | -0.905607 |
| O  | -3.487125 | -4.386744 | 1.819352  |
| O  | -5.173499 | -2.796909 | 1.709358  |
| O  | -3.623239 | -3.627338 | -0.938604 |
| O  | -4.716458 | -1.590705 | -0.929914 |
| O  | -6.154941 | -0.129667 | 1.376607  |
| O  | -5.727041 | 1.713173  | 0.045617  |
| O  | -3.617943 | 3.510135  | 1.159065  |
| O  | -1.582104 | 4.597364  | 1.040772  |
| O  | -4.415074 | 3.490430  | -1.592919 |
| O  | -2.810967 | 5.169513  | -1.595634 |
| O  | -0.168758 | 6.053874  | -1.170644 |
| O  | 1.733818  | 5.609751  | 0.058665  |
| O  | 3.495884  | 4.270506  | 1.610834  |
| O  | 5.132175  | 2.612270  | 1.599770  |
| O  | 3.512732  | 3.490378  | -1.067589 |
| O  | 4.509452  | 1.401759  | -1.026164 |
| O  | 5.949054  | -0.069984 | 1.280738  |
| O  | 5.505088  | -1.708494 | -0.278126 |
| O  | 3.508481  | -3.619054 | 0.940136  |
| O  | 1.472952  | -4.710293 | 0.923684  |
| O  | 4.179676  | -3.488336 | -1.822273 |
| O  | 2.599207  | -5.184778 | -1.716857 |
| O  | -0.068611 | -6.068704 | -1.404061 |
| O  | -1.723389 | -5.723197 | 0.160068  |
| O  | -3.827547 | -0.834976 | 3.268729  |
| O  | -1.600028 | -0.275668 | 2.964216  |
| O  | 1.413749  | 0.267107  | 2.946869  |
| O  | 3.684564  | 0.709186  | 3.179545  |
| O  | 0.625933  | -3.736333 | -3.265457 |
| O  | 0.161848  | -1.493582 | -2.955640 |

|   |           |           |           |
|---|-----------|-----------|-----------|
| O | -0.374381 | 1.485334  | -2.943968 |
| O | -0.841311 | 3.734741  | -3.175969 |
| O | -0.616532 | -3.607110 | 1.957622  |
| O | -3.715323 | 0.599262  | -1.935820 |
| O | 0.591771  | 3.510452  | 2.029595  |
| O | 3.382631  | -0.637798 | -2.078418 |
| S | 8.619515  | -1.206983 | 2.171639  |
| S | -7.102654 | -4.137822 | 3.467824  |
| S | -5.831307 | -1.819385 | -3.726128 |
| S | -1.294815 | -8.408965 | -2.765575 |
| S | 6.310214  | -5.032520 | -3.158559 |
| S | 1.384545  | -0.501770 | -5.457158 |
| S | -8.244179 | 3.162701  | 0.496656  |
| S | -0.551165 | -1.488212 | 5.438699  |
| S | 3.148092  | 8.149218  | -0.459461 |
| S | -4.416691 | 7.191711  | -3.053636 |
| S | -1.693592 | 5.836498  | 3.763093  |
| S | 7.167338  | 4.147741  | 3.134070  |
| S | -1.496271 | 3.545954  | -6.160298 |
| S | 1.727951  | -5.964815 | 3.630582  |
| S | 5.862384  | 1.650543  | -3.725927 |
| S | 3.504976  | 1.305083  | 6.172505  |
| C | 4.422266  | -6.877157 | -3.168466 |
| C | 4.652860  | -5.579384 | -2.744199 |
| C | 6.633144  | -6.618150 | -3.902562 |
| C | 5.544491  | -7.462391 | -3.825927 |
| C | 3.729610  | -4.681223 | -2.038622 |
| C | 0.584488  | -2.536248 | -3.651297 |
| C | 1.038796  | -2.203986 | -5.005528 |
| C | 1.857672  | -1.046294 | -7.084069 |
| C | 1.755948  | -2.415514 | -7.230194 |
| C | 1.298683  | -3.074166 | -6.051842 |
| C | 6.230441  | -1.146208 | 0.610554  |
| C | 7.521831  | -1.784075 | 0.876074  |
| C | 9.776707  | -2.497910 | 1.754215  |
| C | 9.325163  | -3.279260 | 0.710147  |
| C | 8.049329  | -2.881936 | 0.214794  |
| C | -4.655573 | -3.903478 | 2.086087  |
| C | -5.505589 | -4.755877 | 2.928702  |
| C | -5.264923 | -6.029162 | 3.410832  |
| C | -6.331268 | -6.543205 | 4.207058  |
| C | -7.388110 | -5.666157 | 4.335748  |
| C | -4.331666 | -2.704587 | -1.472809 |
| C | -4.774324 | -2.976091 | -2.848243 |
| C | -5.829354 | -2.905878 | -5.136625 |
| C | -5.081601 | -4.045111 | -4.916876 |
| C | -4.483014 | -4.086133 | -3.623595 |
| C | -1.181968 | -6.367263 | -0.795606 |
| C | -1.848175 | -7.589372 | -1.264425 |
| C | -2.907631 | -8.263988 | -0.682822 |
| C | -3.289113 | -9.442740 | -1.391622 |
| C | -2.534297 | -9.669136 | -2.524110 |
| C | -2.625421 | -0.750442 | 3.648625  |
| C | -6.445981 | 1.020726  | 0.845296  |
| C | -7.752301 | 1.582728  | 1.196962  |
| C | -8.709292 | 1.092631  | 2.067179  |
| C | -9.844082 | 1.946645  | 2.202112  |
| C | -9.759120 | 3.089468  | 1.433155  |
| C | -2.268244 | -1.223020 | 4.988553  |

|   |           |            |           |
|---|-----------|------------|-----------|
| C | -1.076684 | -2.046192  | 7.044408  |
| C | -2.450401 | -2.027223  | 7.184550  |
| C | -3.127486 | -1.568262  | 6.017999  |
| C | 0.977901  | 6.357825   | -0.650217 |
| C | 1.455175  | 7.724488   | -0.895643 |
| C | 0.782261  | 8.810392   | -1.428331 |
| C | 1.580062  | 9.992344   | -1.502832 |
| C | 2.866479  | 9.811620   | -1.038624 |
| C | -3.967858 | 4.676616   | -1.833503 |
| C | -4.938377 | 5.573048   | -2.473968 |
| C | -6.283294 | 5.355827   | -2.713177 |
| C | -6.925249 | 6.452063   | -3.362313 |
| C | -6.076193 | 7.508983   | -3.617748 |
| C | -2.681604 | 4.235646   | 1.634032  |
| C | -2.887328 | 4.732322   | 3.003097  |
| C | -3.942790 | 4.463155   | 3.856664  |
| C | -3.829392 | 5.112977   | 5.120873  |
| C | -2.688965 | 5.881086   | 5.238567  |
| C | -0.791101 | 2.547035   | -3.604322 |
| C | 4.667570  | 3.780594   | 1.848806  |
| C | 5.587771  | 4.722819   | 2.500967  |
| C | 5.414778  | 6.078397   | 2.716159  |
| C | 6.518444  | 6.688219   | 3.384168  |
| C | 7.534947  | 5.804016   | 3.679754  |
| C | -1.235135 | 2.233724   | -4.965001 |
| C | -2.034587 | 2.333682   | -7.349475 |
| C | -2.020530 | 1.053255   | -6.835877 |
| C | -1.571456 | 0.994567   | -5.483725 |
| C | 2.601620  | -4.348441  | 1.462902  |
| C | 2.878835  | -4.853095  | 2.815001  |
| C | 2.804848  | -6.022307  | 5.046874  |
| C | 3.936229  | -5.251277  | 4.874687  |
| C | 3.979237  | -4.589147  | 3.612546  |
| C | 4.212893  | 2.549111   | -1.570439 |
| C | 4.759851  | 2.809388   | -2.909822 |
| C | 4.539798  | 3.931589   | -3.688476 |
| C | 5.227427  | 3.902287   | -4.936179 |
| C | 5.977120  | 2.758058   | -5.117038 |
| C | 2.492194  | 0.667088   | 3.602522  |
| C | 2.191282  | 1.100232   | 4.967753  |
| C | 2.300022  | 1.845879   | 7.368539  |
| C | 1.021730  | 1.871953   | 6.850067  |
| C | 0.958543  | 1.454154   | 5.488505  |
| H | 9.897186  | -4.123617  | 0.310301  |
| H | 7.508729  | -3.372451  | -0.605052 |
| H | 10.711897 | -2.603150  | 2.313337  |
| H | 3.459462  | -7.377319  | -3.010013 |
| H | 7.607896  | -6.813019  | -4.355947 |
| H | 5.544074  | -8.478429  | -4.236230 |
| H | -3.378578 | -7.905281  | 0.239294  |
| H | -2.630074 | -10.490489 | -3.240126 |
| H | -4.097102 | -10.114778 | -1.080096 |
| H | -4.336834 | -6.565787  | 3.185530  |
| H | -6.316289 | -7.534947  | 4.671873  |
| H | -8.320707 | -5.808664  | 4.887965  |
| H | -0.267921 | 8.751391   | -1.738006 |
| H | 1.199853  | 10.950922  | -1.876917 |
| H | 3.676204  | 10.546073  | -0.996994 |
| H | 4.515339  | 6.606544   | 2.378039  |

|   |            |           |           |
|---|------------|-----------|-----------|
| H | 6.558767   | 7.753713  | 3.638519  |
| H | 8.481902   | 6.007693  | 4.185604  |
| H | -6.778852  | 4.427284  | -2.405861 |
| H | -7.986714  | 6.456588  | -3.633847 |
| H | -6.307534  | 8.459940  | -4.105206 |
| H | -8.570691  | 0.142702  | 2.593868  |
| H | -10.704635 | 1.722635  | 2.842474  |
| H | -10.497408 | 3.893910  | 1.357053  |
| H | 1.156788   | -4.156372 | -5.957221 |
| H | 2.190229   | -0.316061 | -7.825855 |
| H | 2.007780   | -2.940593 | -8.158970 |
| H | -2.963583  | -2.339875 | 8.100590  |
| H | 0.144430   | 2.184938  | 7.427156  |
| H | 2.624833   | 2.112003  | 8.377780  |
| H | -6.384874  | -2.624913 | -6.035355 |
| H | -4.962420  | -4.836265 | -5.666195 |
| H | -3.850577  | -4.898839 | -3.247341 |
| H | -1.508947  | 0.082447  | -4.880290 |
| H | -2.327305  | 0.171920  | -7.410078 |
| H | -2.329863  | 2.656239  | -8.351577 |
| H | 3.891272   | 4.741568  | -3.336990 |
| H | 5.169548   | 4.706114  | -5.678618 |
| H | 6.597246   | 2.486556  | -5.975058 |
| H | 4.786204   | -3.928277 | 3.275097  |
| H | 4.719472   | -5.161413 | 5.635420  |
| H | 2.525308   | -6.629408 | 5.911821  |
| H | -4.768765  | 3.808166  | 3.558664  |
| H | -4.570339  | 5.015457  | 5.922592  |
| H | -2.360037  | 6.478204  | 6.093189  |
| H | -4.214933  | -1.486991 | 5.912411  |
| H | -0.330593  | -2.364769 | 7.776782  |
| H | 0.049335   | 1.420979  | 4.878241  |
| H | -0.201680  | 4.112215  | 1.797468  |
| H | 0.175064   | 2.608098  | 1.804731  |
| H | 0.177112   | -4.199511 | 1.678528  |
| H | -0.234843  | -2.679905 | 1.755990  |
| H | -4.287580  | -0.208271 | -1.679618 |
| H | -2.790249  | 0.208151  | -1.761938 |
| H | 4.005795   | 0.133602  | -1.824921 |
| H | 2.487494   | -0.217613 | -1.836861 |
